# Supplementary material
Source: publisher figshare collection journal article supplement (https://sage.figshare.com/ndownloader/files/37570201)
Supplement: Supplementary file 1 [file 37570201]

# Flavor sensing in utero and emerging discriminative behaviors in the human fetus

## Supplemental materials

Ustun, B., Reissland, N., Covey, J., Schaal, B. and Blissett, J. (2022)

### Contents

|                                                                                                           |    |
|-----------------------------------------------------------------------------------------------------------|----|
| Supplemental Note   Adapted Vegetable Food Frequency Questionnaire (VFFQ).....                            | 2  |
| Supplemental Table S1  The mean of codable scan length (in seconds) .....                                 | 4  |
| Supplemental Table S2  Chi-Square Test to examine fetal sex differences in the dataset.....               | 4  |
| Supplemental Table S3  Descriptive statistics of maternal and fetal information .....                     | 5  |
| Supplemental Table S4  Predictor fetal and maternal variables in relation to fetal movements .....        | 6  |
| Supplemental Table S5  Independent sample t-test on the frequency of maternal vegetable consumption ..... | 7  |
| Supplemental Table S6  Correlations between maternal mental health scores and FMs at 32 weeks .....       | 8  |
| Supplemental Table S7  Correlations between maternal mental health scores and FMs at 36 weeks .....       | 9  |
| Reference: .....                                                                                          | 10 |

## **Supplemental Note | Adapted Vegetable Food Frequency Questionnaire (VFFQ)**

The following questions are about the foods you **USUALLY** eat. Please indicate the number of days per week that you eat each item on average.

*Please do not include the amount of Kale or Carrot capsules you consume during the study!*

VFFQ1: How many times a week nowadays do you eat carrots (raw, cooked or boiled)?

- ☐ Rarely or Never
- ☐ Once a fortnight
- ☐ 1-3 times
- ☐ 4-7 times
- ☐ More than once a day

VFFQ2: How many times a week nowadays do drink carrot juice/smoothie?

- ☐ Rarely or Never
- ☐ Once a fortnight
- ☐ 1-3 times
- ☐ 4-7 times
- ☐ More than once a day

VFFQ3: How many times a week nowadays do you eat kale (raw, cooked or boiled)?

- ☐ Rarely or Never
- ☐ Once a fortnight
- ☐ 1-3 times
- ☐ 4-7 times
- ☐ More than once a day

VFFQ4: How many times a week nowadays do drink kale juice/smoothie?

- ☐ Rarely or Never
- ☐ Once a fortnight
- ☐ 1-3 times
- ☐ 4-7 times
- ☐ More than once a day

VFFQ5: How many times a week nowadays do you eat chips, roast potatoes, boiled, mashed, jacket potatoes, sweet potatoes?

- ☐ Rarely or Never
- ☐ Once a fortnight
- ☐ 1-3 times
- ☐ 4-7 times
- ☐ More than once a day

VFFQ6: How many times a week nowadays do you eat peas, beans, sweetcorn?

- ☐ Rarely or Never
- ☐ Once a fortnight
- ☐ 1-3 times

- 4-7 times
- More than once a day

VFFQ7: How many times a week nowadays do you eat brassica vegetables?

- Rarely or Never
- Once a fortnight
- 1-3 times
- 4-7 times
- More than once a day

VFFQ8: How many times a week nowadays do you eat other green vegetables (lettuce, leeks etc.)?

- Rarely or Never
- Once a fortnight
- 1-3 times
- 4-7 times
- More than once a day

**Scoring:** The Sheffield Pregnancy Food Frequency Questionnaire (Mouratidou et al., 2006) was used as a reference from which the questions were adapted. Each item is rated on a 5-point Likert-scale ranging from rarely or never (1) to more than once a day (5). The ratings are summed and higher scores indicating a higher frequency of vegetable consumption.

Carrot consumption: VFFQ1 + VFFQ2 (min:1, max:10)

Kale consumption: VFFQ3 + VFFQ4 (min:1, max:10)

Other non-bitter vegetable consumption: VFFQ5 + VFFQ6 (min:1, max:10)

Other bitter vegetable consumption: VFFQ7 + VFFQ8 (min:1, max:10)

Overall non-bitter vegetable consumption: VFFQ1 + VFFQ2 + VFFQ5 + VFFQ6 (min:1, max:20)

Overall bitter vegetable consumption: VFFQ3 + VFFQ4 + VFFQ7 + VFFQ8 (min:1, max:20)

**Supplemental Table S1|** The mean of codable scan length (in seconds)

|             | Kale Flavour Group<br>Mean (SE) | Carrot Flavour Group<br>Mean (SE) | Control Group<br>Mean (SE) |
|-------------|---------------------------------|-----------------------------------|----------------------------|
| At 32 weeks | 487.56 (49.786)                 | 425.49 (60.501)                   | 458.25 (49.159)            |
| At 36 weeks | 499.85 (60.694)                 | 467.03 (60.255)                   | 508.21 (46.774)            |

**Supplemental Table S2|** Chi-Square Test to examine fetal sex differences in the dataset*Chi-Square Tests*

|                    | Value | df | Asymptotic<br>Significance (2-<br>sided) |
|--------------------|-------|----|------------------------------------------|
| Pearson Chi-Square | .018  | 2  | .991                                     |
| N of Valid Cases   | 99    |    |                                          |

*Group \* Sex Cross tabulation*

| Exposure |                | Female | Male | Total |
|----------|----------------|--------|------|-------|
| group    |                |        |      |       |
| Kale     | Count          | 17     | 17   | 34    |
|          | Expected Count | 16.8   | 17.2 | 34.0  |
| Carrot   | Count          | 17     | 18   | 35    |
|          | Expected Count | 17.3   | 17.7 | 35.0  |
| Control  | Count          | 15     | 15   | 30    |
|          | Expected Count | 14.8   | 15.2 | 30.0  |
| Total    | Count          | 49     | 50   | 99    |
|          | Expected Count | 49.0   | 50.0 | 99.0  |

**Supplemental Table S3|** Descriptive statistics of maternal and fetal information

|                                      | Kale Flavour Group                                                  | Carrot Flavour Group                                    | Control Group                                                       |
|--------------------------------------|---------------------------------------------------------------------|---------------------------------------------------------|---------------------------------------------------------------------|
|                                      | N<br>Mean (SE)                                                      | N<br>Mean (SE)                                          | N<br>Mean (SE)                                                      |
| <i>Demographics</i>                  | N=34                                                                | N= 35                                                   | N=30                                                                |
| Maternal age                         | 29.88 (.774)                                                        | 31.26 (.792)                                            | 28.4 (1.033)                                                        |
| BMI                                  | 25.86 (.571)                                                        | 26.15 (.604)                                            | 25.55 (.307)                                                        |
| Level of Education                   | GCSE (2)<br>College/A level (13)<br>Degree (14)<br>Postgraduate (5) | College/A level (22)<br>Degree (11)<br>Postgraduate (2) | GCSE (3)<br>College/A level (10)<br>Degree (10)<br>Postgraduate (7) |
| <i>Fetus information</i>             |                                                                     |                                                         |                                                                     |
| Fetal head circumference at 20 weeks | 168.07 (1.424)                                                      | 164.35 (1.023)                                          | 171.23 (1.493)                                                      |
| Fetal exact age at 32 weeks          | 32.09 (.070)                                                        | 32.12(.096)                                             | 32.09 (.100)                                                        |
| 36 weeks                             | 35.97 (.089)                                                        | 36.04 (.098)                                            | 35.83 (.095)                                                        |
| <i>Birth outcomes</i>                |                                                                     |                                                         |                                                                     |
| Birth Weight (grams)                 | 3346.26 (40.296)                                                    | 3255.42 (61.727)                                        | 3428.12 (99.775)                                                    |
| Gestational Age at Birth (weeks)     | 39.3 (.170)                                                         | 39.39 (.185)                                            | 39.83 (.182)                                                        |

**Supplemental Table S4**| Predictor fetal and maternal variables in relation to fetal movements

| Variable                                | 95% Confidence<br>Interval for Mean |                          |         |          |
|-----------------------------------------|-------------------------------------|--------------------------|---------|----------|
|                                         | F                                   | Sig.<br>(Between groups) | Lower   | Upper    |
| Maternal Age                            | 2.698                               | .072                     | 28.914  | 30.921   |
| Maternal pre-pregnancy BMI              | .319                                | .728                     | 25.268  | 26.469   |
| Gestational Age at Birth (in weeks)     | 2.517                               | .086                     | 39.275  | 39.693   |
| Birth Weight (in gram)                  | .405                                | .668                     | 3295.73 | 3452.541 |
| Head Circumference (in cm) at 20 weeks* | 6.781                               | <b>.002*</b>             | 166.123 | 169.304  |

\*included as a covariate.

**Supplemental Table S5** | Independent sample t-test on the frequency of maternal vegetable consumption

|                                          | F     | Sig. | t     | df | Two-Sided<br>p | Mean<br>Difference | Std. Error<br>Difference | 95% Confidence Interval<br>of the Difference |       |
|------------------------------------------|-------|------|-------|----|----------------|--------------------|--------------------------|----------------------------------------------|-------|
|                                          |       |      |       |    |                |                    |                          | Lower                                        | Upper |
| <i>Vegetable consumption at 32 weeks</i> |       |      |       |    |                |                    |                          |                                              |       |
| Kale                                     | 1.910 | .172 | .458  | 67 | .649           | .068               | .149                     | -.229                                        | .365  |
| Carrot                                   | .079  | .780 | -.054 | 67 | .957           | -.010              | .185                     | -.380                                        | .360  |
| Overall bitter                           | .545  | .463 | .517  | 67 | .607           | .294               | .569                     | -.841                                        | 1.429 |
| Overall non-bitter                       | .748  | .390 | .011  | 67 | .991           | .005               | .431                     | -.855                                        | .865  |
| <i>Vegetable consumption at 36 weeks</i> |       |      |       |    |                |                    |                          |                                              |       |
| Kale                                     | 3.400 | .070 | 2.156 | 67 | .035           | .513               | .238                     | .038                                         | .988  |
| Carrot                                   | 1.927 | .170 | -.660 | 67 | .511           | -.152              | .231                     | -.613                                        | .309  |
| Overall bitter                           | 1.142 | .289 | .598  | 67 | .552           | .271               | .452                     | -.632                                        | 1.174 |
| Overall non-bitter                       | .029  | .864 | -.721 | 67 | .473           | -.305              | .422                     | -1.147                                       | .538  |

**Supplemental Table S6** | Correlations between maternal mental health scores and FMs at 32 weeks

| Fetal Movements                      |                       | Anxiety (HADS) | Depression (HADS) | Stress (PSS) |
|--------------------------------------|-----------------------|----------------|-------------------|--------------|
|                                      |                       | 32 weeks       | 32 weeks          | 32 weeks     |
| FM1-Inner-brow-raiser<br>32 weeks    | Pearsons Correlations | .075           | .152              | .070         |
|                                      | Sig. (2-tailed)       | .464           | .138              | .494         |
|                                      | N                     | 97             | 97                | 97           |
| FM2-Outer-brow-raiser<br>32 weeks    | Pearsons Correlations | .112           | .015              | -.003        |
|                                      | Sig. (2-tailed)       | .275           | .881              | .977         |
|                                      | N                     | 97             | 97                | 97           |
| FM4-Brow-lowerer<br>32 weeks         | Pearsons Correlations | -.005          | .110              | -.008        |
|                                      | Sig. (2-tailed)       | .960           | .281              | .938         |
|                                      | N                     | 97             | 97                | 97           |
| FM6-Cheek-raiser<br>32 weeks         | Pearsons Correlations | .043           | -.001             | -.067        |
|                                      | Sig. (2-tailed)       | .679           | .989              | .513         |
|                                      | N                     | 97             | 97                | 97           |
| FM9-Nose-wrinkle<br>32 weeks         | Pearsons Correlations | -.032          | -.033             | -.074        |
|                                      | Sig. (2-tailed)       | .756           | .751              | .470         |
|                                      | N                     | 97             | 97                | 97           |
| FM10-Upper-lip-raiser<br>32 weeks    | Pearsons Correlations | .111           | .028              | .036         |
|                                      | Sig. (2-tailed)       | .280           | .782              | .723         |
|                                      | N                     | 97             | 97                | 97           |
| FM11-Nasolabial-furrow<br>32 weeks   | Pearsons Correlations | .114           | .092              | .060         |
|                                      | Sig. (2-tailed)       | .267           | .372              | .559         |
|                                      | N                     | 97             | 97                | 97           |
| FM12-Lip-corner-puller<br>32 weeks   | Pearsons Correlations | -.098          | .002              | -.069        |
|                                      | Sig. (2-tailed)       | .338           | .985              | .502         |
|                                      | N                     | 97             | 97                | 97           |
| FM16-Lower-lip-depressor<br>32 weeks | Pearsons Correlations | .092           | .011              | .066         |
|                                      | Sig. (2-tailed)       | .368           | .912              | .519         |
|                                      | N                     | 97             | 97                | 97           |
| FM18-Lip-pucker<br>32 weeks          | Pearsons Correlations | -.180          | -.118             | -.146        |
|                                      | Sig. (2-tailed)       | .078           | .251              | .154         |
|                                      | N                     | 97             | 97                | 97           |
| FM19-Tongue-show<br>32 weeks         | Pearsons Correlations | -.154          | -.049             | -.155        |
|                                      | Sig. (2-tailed)       | .133           | .634              | .128         |
|                                      | N                     | 97             | 97                | 97           |
| FM20-Lip-stretch<br>32 weeks         | Pearsons Correlations | .193           | .014              | .058         |
|                                      | Sig. (2-tailed)       | .058           | .892              | .574         |
|                                      | N                     | 97             | 97                | 97           |
| FM24-Lip-presser<br>32 weeks         | Pearsons Correlations | .080           | .036              | .051         |
|                                      | Sig. (2-tailed)       | .438           | .724              | .622         |
|                                      | N                     | 97             | 97                | 97           |

*Continued on next page*

| Fetal Movements ( <i>continued</i> ) |                       | Anxiety (HADS) | Depression (HADS) | Stress (PSS) |
|--------------------------------------|-----------------------|----------------|-------------------|--------------|
|                                      |                       | 32 weeks       | 32 weeks          | 32 weeks     |
| FM25–Lips-parting<br>32 weeks        | Pearsons Correlations | -.152          | -.037             | -.136        |
|                                      | Sig. (2-tailed)       | .137           | .720              | .183         |
|                                      | N                     | 97             | 97                | 97           |
| FM26–Jaw-drop<br>32 weeks            | Pearsons Correlations | -.099          | -.065             | -.109        |
|                                      | Sig. (2-tailed)       | .332           | .526              | .289         |
|                                      | N                     | 97             | 97                | 97           |
| FM27–Mouth-stretch<br>32 weeks       | Pearsons Correlations | -.151          | -.014             | -.097        |
|                                      | Sig. (2-tailed)       | .141           | .891              | .344         |
|                                      | N                     | 97             | 97                | 97           |
| FM28–Lip-suck<br>32 weeks            | Pearsons Correlations | -.033          | -.043             | -.083        |
|                                      | Sig. (2-tailed)       | .750           | .679              | .417         |
|                                      | N                     | 97             | 97                | 97           |

**Supplemental Table S7** | Correlations between maternal mental health scores and FMs at 36 weeks

| Fetal Movements                    |                       | Anxiety (HADS) | Depression (HADS) | Stress (PSS) |
|------------------------------------|-----------------------|----------------|-------------------|--------------|
|                                    |                       | 36 weeks       | 36 weeks          | 36 weeks     |
| FM1–Inner-brow-raiser<br>36 weeks  | Pearsons Correlations | -.086          | -.170             | -.080        |
|                                    | Sig. (2-tailed)       | .440           | .124              | .472         |
|                                    | N                     | 83             | 83                | 83           |
| FM2–Outer-brow-raiser<br>36 weeks  | Pearsons Correlations | .053           | .004              | -.021        |
|                                    | Sig. (2-tailed)       | .634           | .968              | .853         |
|                                    | N                     | 83             | 83                | 83           |
| FM4–Brow-lowerer<br>36 weeks       | Pearsons Correlations | -.040          | -.079             | .006         |
|                                    | Sig. (2-tailed)       | .723           | .477              | .958         |
|                                    | N                     | 83             | 83                | 83           |
| FM6–Cheek-raiser<br>36 weeks       | Pearsons Correlations | .180           | .063              | .083         |
|                                    | Sig. (2-tailed)       | .103           | .574              | .457         |
|                                    | N                     | 83             | 83                | 83           |
| FM9–Nose-wrinkle<br>36 weeks       | Pearsons Correlations | -.066          | -.066             | -.123        |
|                                    | Sig. (2-tailed)       | .554           | .555              | .266         |
|                                    | N                     | 83             | 83                | 83           |
| FM10–Upper-lip-raiser<br>36 weeks  | Pearsons Correlations | -.096          | -.185             | -.038        |
|                                    | Sig. (2-tailed)       | .386           | .094              | .733         |
|                                    | N                     | 83             | 83                | 83           |
| FM11–Nasolabial-furrow<br>36 weeks | Pearsons Correlations | .102           | .024              | .165         |
|                                    | Sig. (2-tailed)       | .357           | .828              | .136         |
|                                    | N                     | 83             | 83                | 83           |

*Continued on next page*

| Fetal Movements ( <i>continued</i> )               |                       | Anxiety (HADS) | Depression (HADS) | Stress (PSS) |
|----------------------------------------------------|-----------------------|----------------|-------------------|--------------|
|                                                    |                       | 36 weeks       | 36 weeks          | 36 weeks     |
| FM12–Lip-corner-puller<br>36 weeks                 | Pearsons Correlations | .141           | -.013             | .108         |
|                                                    | Sig. (2-tailed)       | .202           | .906              | .331         |
|                                                    | N                     | 83             | 83                | 83           |
| <b>FM16–Lower-lip-depressor</b><br><b>36 weeks</b> | Pearsons Correlations | .138           | .113              | <b>.220*</b> |
|                                                    | Sig. (2-tailed)       | .213           | .309              | <b>.045</b>  |
|                                                    | N                     | 83             | 83                | 83           |
| FM18–Lip-pucker<br>36 weeks                        | Pearsons Correlations | .102           | -.180             | .031         |
|                                                    | Sig. (2-tailed)       | .360           | .104              | .779         |
|                                                    | N                     | 83             | 83                | 83           |
| FM19–Tongue-show<br>36 weeks                       | Pearsons Correlations | .132           | .189              | .108         |
|                                                    | Sig. (2-tailed)       | .234           | .087              | .333         |
|                                                    | N                     | 83             | 83                | 83           |
| FM20–Lip-stretch<br>36 weeks                       | Pearsons Correlations | .042           | .061              | .197         |
|                                                    | Sig. (2-tailed)       | .706           | .587              | .074         |
|                                                    | N                     | 83             | 83                | 83           |
| FM24–Lip-presser<br>36 weeks                       | Pearsons Correlations | -.074          | -.133             | -.026        |
|                                                    | Sig. (2-tailed)       | .507           | .232              | .813         |
|                                                    | N                     | 83             | 83                | 83           |
| FM25–Lips-parting<br>36 weeks                      | Pearsons Correlations | .028           | -.032             | -.014        |
|                                                    | Sig. (2-tailed)       | .803           | .777              | .898         |
|                                                    | N                     | 83             | 83                | 83           |
| FM26–Jaw-drop<br>36 weeks                          | Pearsons Correlations | .031           | -.007             | -.008        |
|                                                    | Sig. (2-tailed)       | .783           | .946              | .946         |
|                                                    | N                     | 83             | 83                | 83           |
| FM27–Mouth-stretch<br>36 weeks                     | Pearsons Correlations | .021           | .015              | -.002        |
|                                                    | Sig. (2-tailed)       | .848           | .894              | .983         |
|                                                    | N                     | 83             | 83                | 83           |
| FM28–Lip-suck<br>36 weeks                          | Pearsons Correlations | .128           | -.110             | .078         |
|                                                    | Sig. (2-tailed)       | .248           | .321              | .483         |
|                                                    | N                     | 83             | 83                | 83           |

\*Correlation is significant at the 0.05 level (2-tailed)

## Reference:

Mouratidou, T., Ford, F. & Fraser, B. (2006). Validation of a food-frequency questionnaire for use in pregnancy. *Public Health Nutrition*, 9(4), 515–522. <https://doi.org/10.1079/PHN2005876>
